# Supplementary material for: A highly pyrrolic-N doped carbon modified SiOx anode for superior lithium storage
Source: Royal Society of Chemistry journal article supplement (doi:10.1039/d4dt02247e), 2024-01-01
Supplement: d4dt02247e1.pdf [file d4dt02247e1.pdf]

## Supporting Information

# High Pyrrolic-N Doped Carbon Modified $\text{SiO}_x$ Anode for Superior Lithium Storage

Ziqiao Yan, ‡<sup>ab</sup> Xiuhuan Huang, ‡<sup>c</sup> Xiujuan Wei,<sup>\*ab</sup> Manyuan Xu,<sup>b</sup> Jinqiu Huang,<sup>b</sup> Shuxing Wu,<sup>b</sup> Kai-Hang Ye,<sup>b</sup> and Zhan Lin<sup>\*ab</sup>

<sup>a</sup> Guangdong Provincial Laboratory of Chemistry and Fine Chemical Engineering Jieyang Center, Jieyang 515200, China.

<sup>b</sup> Institute for Sustainable Transformation, School of Chemical Engineering and Light Industry, Guangdong University of Technology, Guangzhou 510006, China.

<sup>c</sup> College of Light Industry and Chemical Engineering, Guangxi Vocational and Technical Institute of Industry, Nanning 530001, China.

‡ These authors have contributed equally to this work.

\* Corresponding authors:

Xiujuan Wei; e-mail: xjwei@gdut.edu.cn;

Zhan Lin; e-mail: zhanlin@gdut.edu.cn;

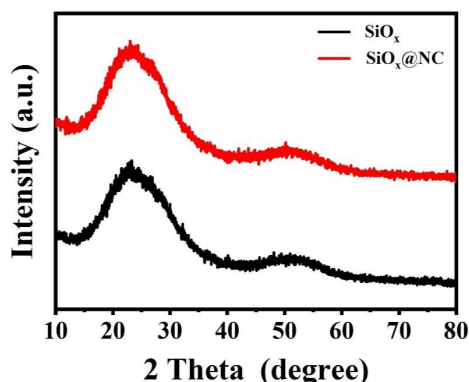

Figure S1. The XRD spectra of  $\text{SiO}_x@\text{NC}$  and  $\text{SiO}_x$ .

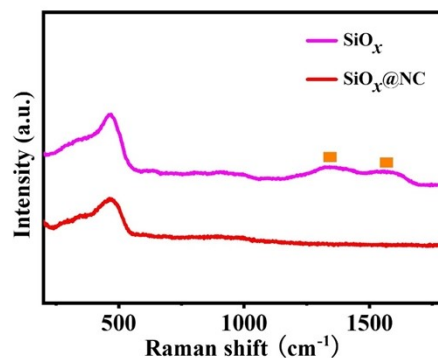

Figure S2. Raman spectra of  $\text{SiO}_x$  and  $\text{SiO}_x@\text{NC}$

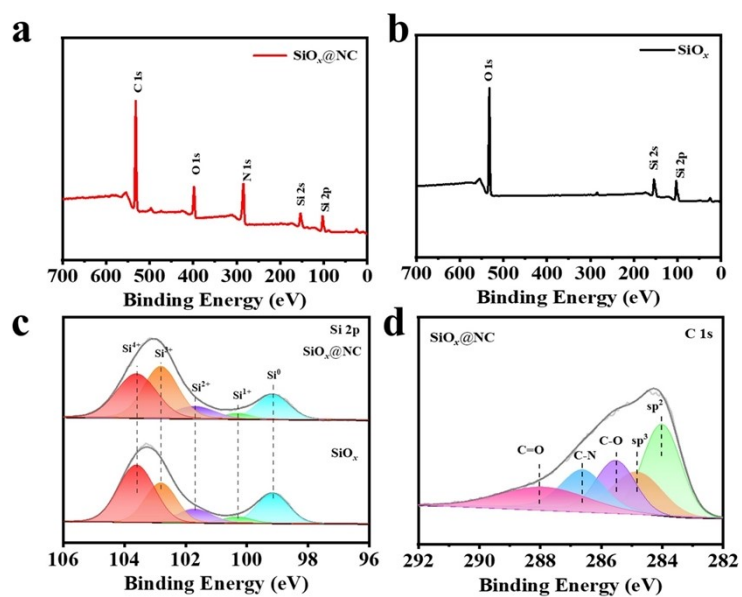

**Figure S3.** XPS spectra of (a)  $\text{SiO}_x@NC$  and (b)  $\text{SiO}_x$ , (c) fine spectra of Si 2p and (d) the XPS C1s spectrum of  $\text{SiO}_x@NC$ ;

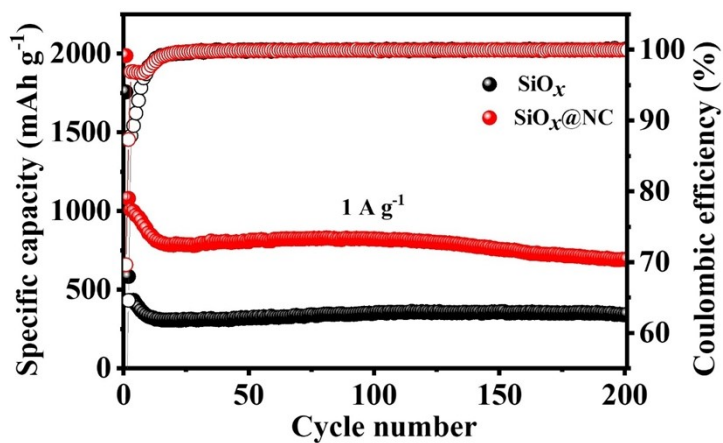

**Figure S4.** Cycling performance of  $\text{SiO}_x@NC$  electrode and  $\text{SiO}_x$  electrode at  $1 \text{ A g}^{-1}$ .

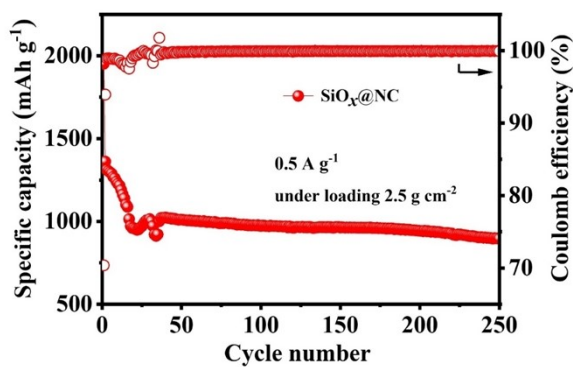

**Figure S5.** Cycling performance of SiO<sub>x</sub>@NC at high loading.

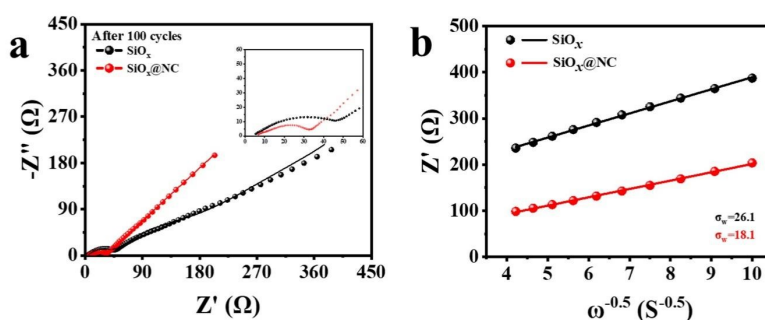

**Figure S6.** (a) The EIS after 100 cycles of SiO<sub>x</sub>@NC and SiO<sub>x</sub> electrode and (b) the Z' and  $\omega^{-1/2}$  relationship.

**Table S1.** Organic element analysis of SiO<sub>x</sub>@NC sample

| Sample               | C [%] | H [%] | N [%] |
|----------------------|-------|-------|-------|
| SiO <sub>x</sub> @NC | 7.819 | 0.372 | 4.915 |

**Table S2.** Impedance parameters of SiO<sub>x</sub> and SiO<sub>x</sub>@NC electrodes before and after 100 cycles.

| Before cycling       |                    | After cycling       |                    |                      |                     |
|----------------------|--------------------|---------------------|--------------------|----------------------|---------------------|
| electrodes           | R <sub>s</sub> (Ω) | R <sub>ct</sub> (Ω) | R <sub>s</sub> (Ω) | R <sub>SEI</sub> (Ω) | R <sub>ct</sub> (Ω) |
| SiO <sub>x</sub>     | 42.6               | 369.8               | 4.6                | 39.0                 | 62.3                |
| SiO <sub>x</sub> @NC | 22.8               | 242.7               | 6.3                | 8.5                  | 15.5                |
